# Supplementary material for: Volumetric evaluation of lumbar epidural fat distribution in epidural lipomatosis and back pain in patients who are obese: introducing a novel technique (Fat Finder algorithm)
Source: PubMed Central journal article supplement — BMJ Open Diabetes Res Care. 2019 Mar 17;7(1):e000599. doi: 10.1136/bmjdrc-2018-000599 (PMC6501852; doi:10.1136/bmjdrc-2018-000599), 2019-03-17
Supplement: bmjdrc-2018-000599supp001.pdf [file bmjdrc-2018-000599supp001.pdf]

Supplemental Table 1. Intra- and inter-observer reliability correlation for multi-reader and multi-run validation testing.

| <b>Observers</b> | <b>Intra- &amp; inter-observer reliability (ICC)</b> | <b>95% Confidence interval</b> | <b>p-value</b> |
|------------------|------------------------------------------------------|--------------------------------|----------------|
| A1 vs A2         | 0.999                                                | 0.996-1.00                     | <0.0001        |
| B1 vs B2         | 0.998                                                | 0.992-0.999                    | <0.0001        |
| C1 vs C2         | 0.993                                                | 0.976-0.998                    | <0.0001        |
| D1 vs D2         | 0.997                                                | 0.990-0.999                    | <0.0001        |
| A1, B1, C1, D1   | 0.997                                                | 0.993-0.999                    | <0.0001        |
| A2, B2, C2, D2   | 0.998                                                | 0.995-0.999                    | <0.0001        |

Supplemental Table 2. Comparison statistics for the epidural fat volume measurements and distribution between the two MRI techniques.

| <b>Fat Volume</b> | <b>Normal Group<br/>(Mean <math>\pm</math> SD in mm<sup>3</sup>)</b> | <b>Parallel Group<br/>(Mean <math>\pm</math> SD in mm<sup>3</sup>)</b> | <b>Paired t-test p-value</b> | <b>Correlation<br/>Coefficient (p-value)</b> |
|-------------------|----------------------------------------------------------------------|------------------------------------------------------------------------|------------------------------|----------------------------------------------|
| Total             | 4873 $\pm$ 2336                                                      | 5050 $\pm$ 2285                                                        | 0.2                          | 0.98 (<0.001)                                |
| L2 – L5 Only      | 3451 $\pm$ 1646                                                      | 3401 $\pm$ 1605                                                        | 0.51                         | 0.99 (<0.001)                                |
| Top (L1-L3)       | 1216 $\pm$ 675                                                       | 1295 $\pm$ 645                                                         | 0.13                         | 0.97 (<0.001)                                |
| Bottom (L4-S1)    | 3657 $\pm$ 1872                                                      | 3755 $\pm$ 1903                                                        | 0.4                          | 0.98 (<0.001)                                |
| L2 Only           | 365 $\pm$ 191                                                        | 379 $\pm$ 230                                                          | 0.48                         | 0.97 (<0.001)                                |
| L3 Only           | 551 $\pm$ 254                                                        | 600 $\pm$ 221                                                          | 0.21                         | 0.88 (<0.001)                                |
| L4 Only           | 782 $\pm$ 427                                                        | 764 $\pm$ 527                                                          | 0.76                         | 0.95 (<0.001)                                |
| L5 Only           | 1347 $\pm$ 771                                                       | 1202 $\pm$ 776                                                         | 0.05                         | 0.96 (<0.001)                                |
